# Supplementary material for: Detection of Peanut Allergen by Real Time PCR: Looking For the Suitable Detection Marker and Dna Isolation Method
Source: Preprints.org preprint supplement (doi:10.20944/preprints202104.0382.v1), 2021-04-14
Supplement: Supplementary file 1 [file supplementary]

**Table 1 SM.** Preparation of binary mixtures of peanut in spelt wheat flours.

| Mixture | Peanut (g) | Wheat (g) | % | mg/kg |
| --- | --- | --- | --- | --- |
| S1 | 10 | 90 | 10 | 100.000 |
| S2 | 10 | 90 | 1 | 10.000 |
| S3 | 10 | 90 | 0,1 | 1.000 |
| S4 | 50 | 50 | 0,05 | 500 |
| S5 | 20 | 80 | 0,01 | 100 |
| S6 | 50 | 50 | 0,005 | 50 |
| S7 | 20 | 80 | 0,001 | 10 |
| S8 | 10 | 90 | 0,0001 | 1 |
| S9 | 50 | 50 | 0,00005 | 0.5 |
| S10 | 20 | 80 | 0.0001 | 0.1 |

Table 2 SM. Primers used for sequencing purposes.

| Oligo | Sequence 5’🡪 3’ | Amplicon size |
| --- | --- | --- |
| trnH-psbA fw | ACATCCGCCCAAAGGAGAAAT | 414 |
| trnH-psbA rev | TCTGGTTTACCGCGTTAGGT |
| rpl 16 fw | GCGATGGGAACGACGAAAAC | 493 |
| rpl 16 rev | ACGGCTCCTCGCGAATAAAA |
| mat k fw | TGGACTCGCCTCTGGTCAT | 392 |
| mat k rev | CCAGATGGATAGGATAGGGTATTCG |
| Ara h 6 fw | AGTACTCGATCCTCCGACCA | 392 |
| Ara h rev | AAGCCATAAGAGCACACCGAA |


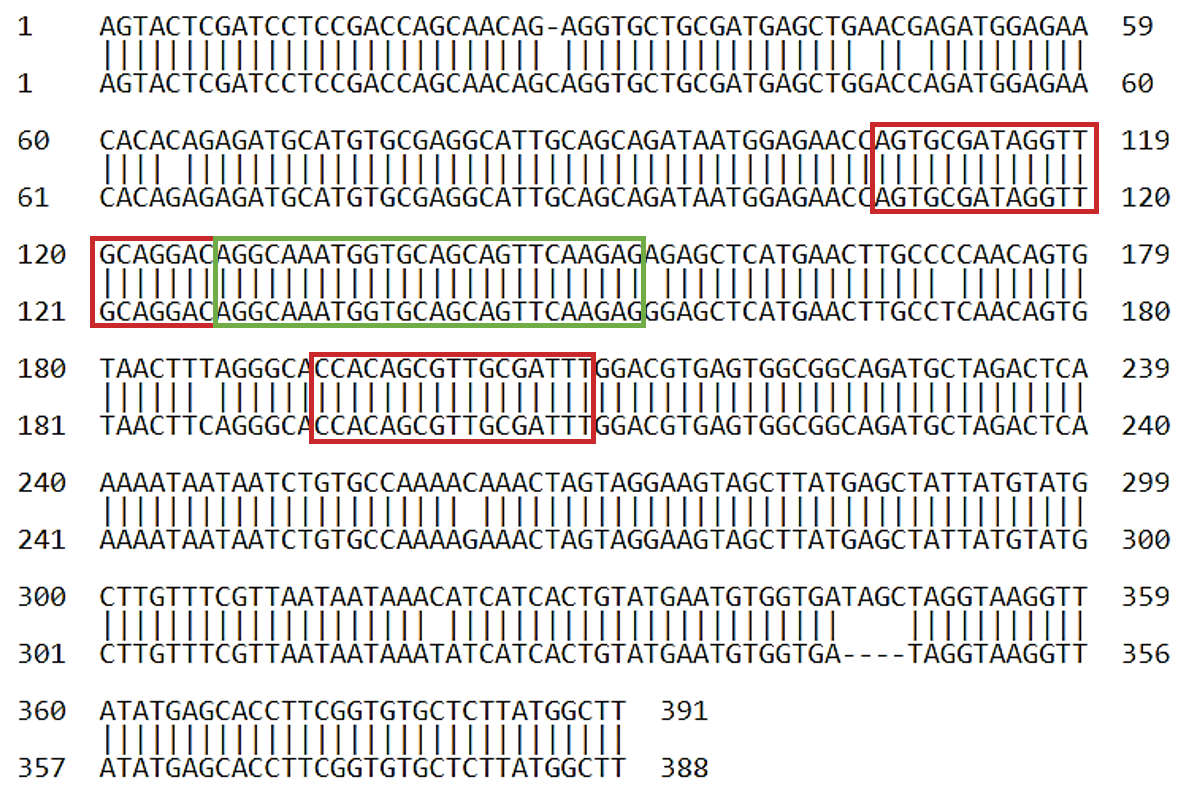


Figure 1SM. Sequence alignment of two clones of partial Ara h 6-allergen coding gene. Primers and probe designed for real-time PCR experiment are squared in red and green respectively.


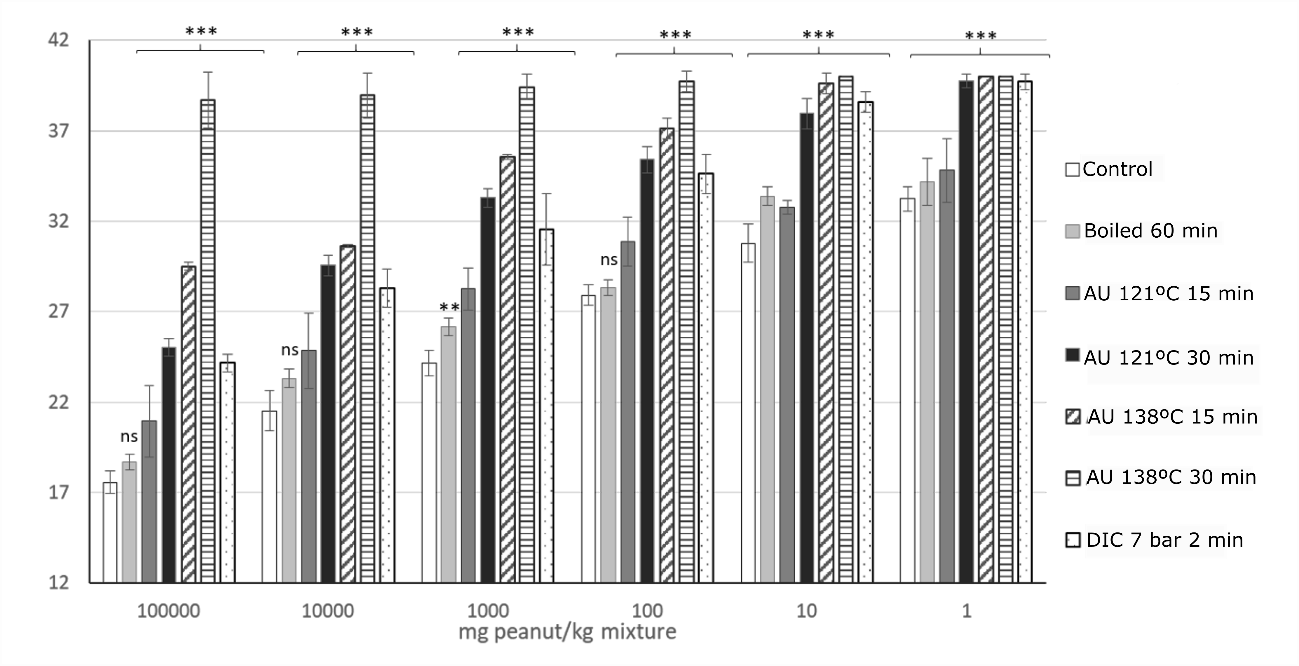


Figure 2SM. Amplification of mat K marker in treated and untreated binary mixtures. Amplification of mat K target in samples from binary mixtures builts with known quantity (10000 to 1mg/kg) of untreated (control) and treated (boiled, autoclaved and despressurised) peanut flour in wheat flour. DNA from all samples was obtained with Dneasy Plant Pro Kit. Mean and standard deviation is shown. Significant differences were found between Ct obtained in untreated and treated samples, for the same spiked level (p < 0.05, by *t*-student test).
